# Supplementary material
Source: PubMed Central journal article supplement (PMC10278786)

## **SUPPLEMENTAL MATERIAL**

Supplemental Figure 1: Comparison of the TKV in our pediatric dataset (blue dots) with the published normal TKV ranges (orange line (mean) with 95% confidence interval (green - red lines)) by Leung et al.<sup>35</sup>

Supplemental Figure 2: Evolution of eGFR as a function of age with linear regression analysis per subclass of the LIC model.

**SUPPLEMENTAL MATERIAL**

**Supplemental Figure 1:** Comparison of the TKV in our pediatric dataset (blue dots) with the published normal TKV ranges (orange line (mean) with 95% confidence interval (green - red lines)) by Leung et al.<sup>35</sup>

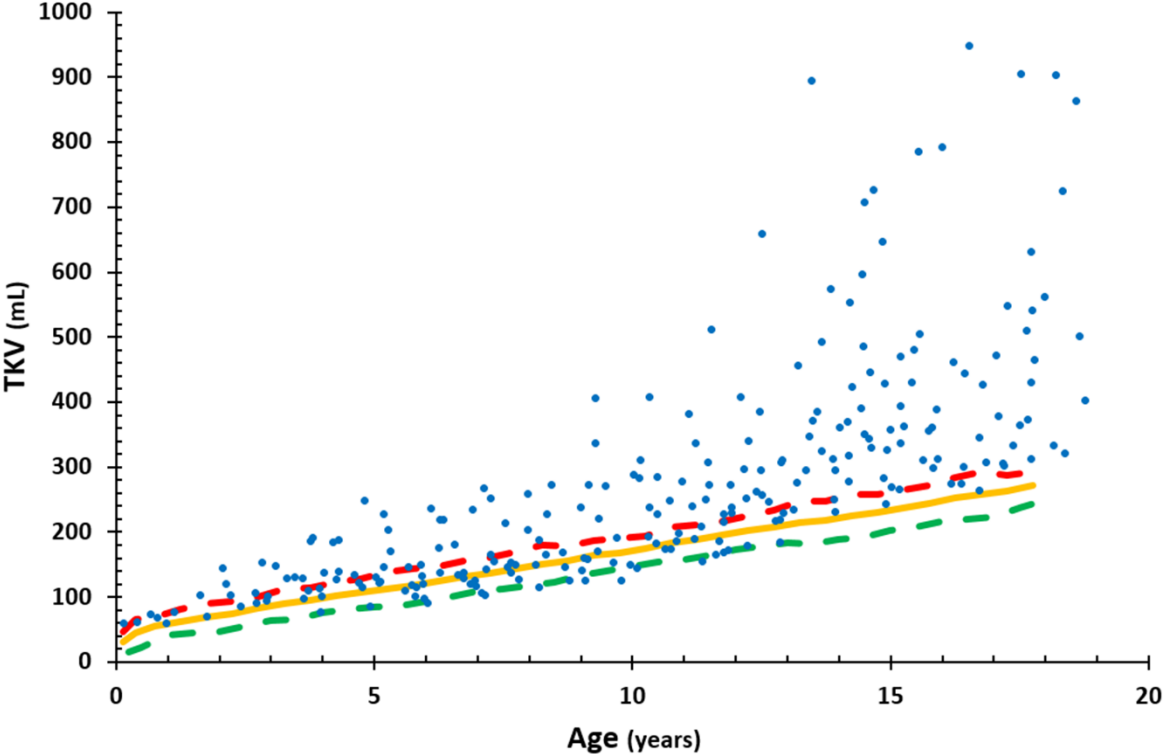

**Supplemental Figure 2:** Evolution of eGFR as a function of age with linear regression analysis per subclass of the LIC model.

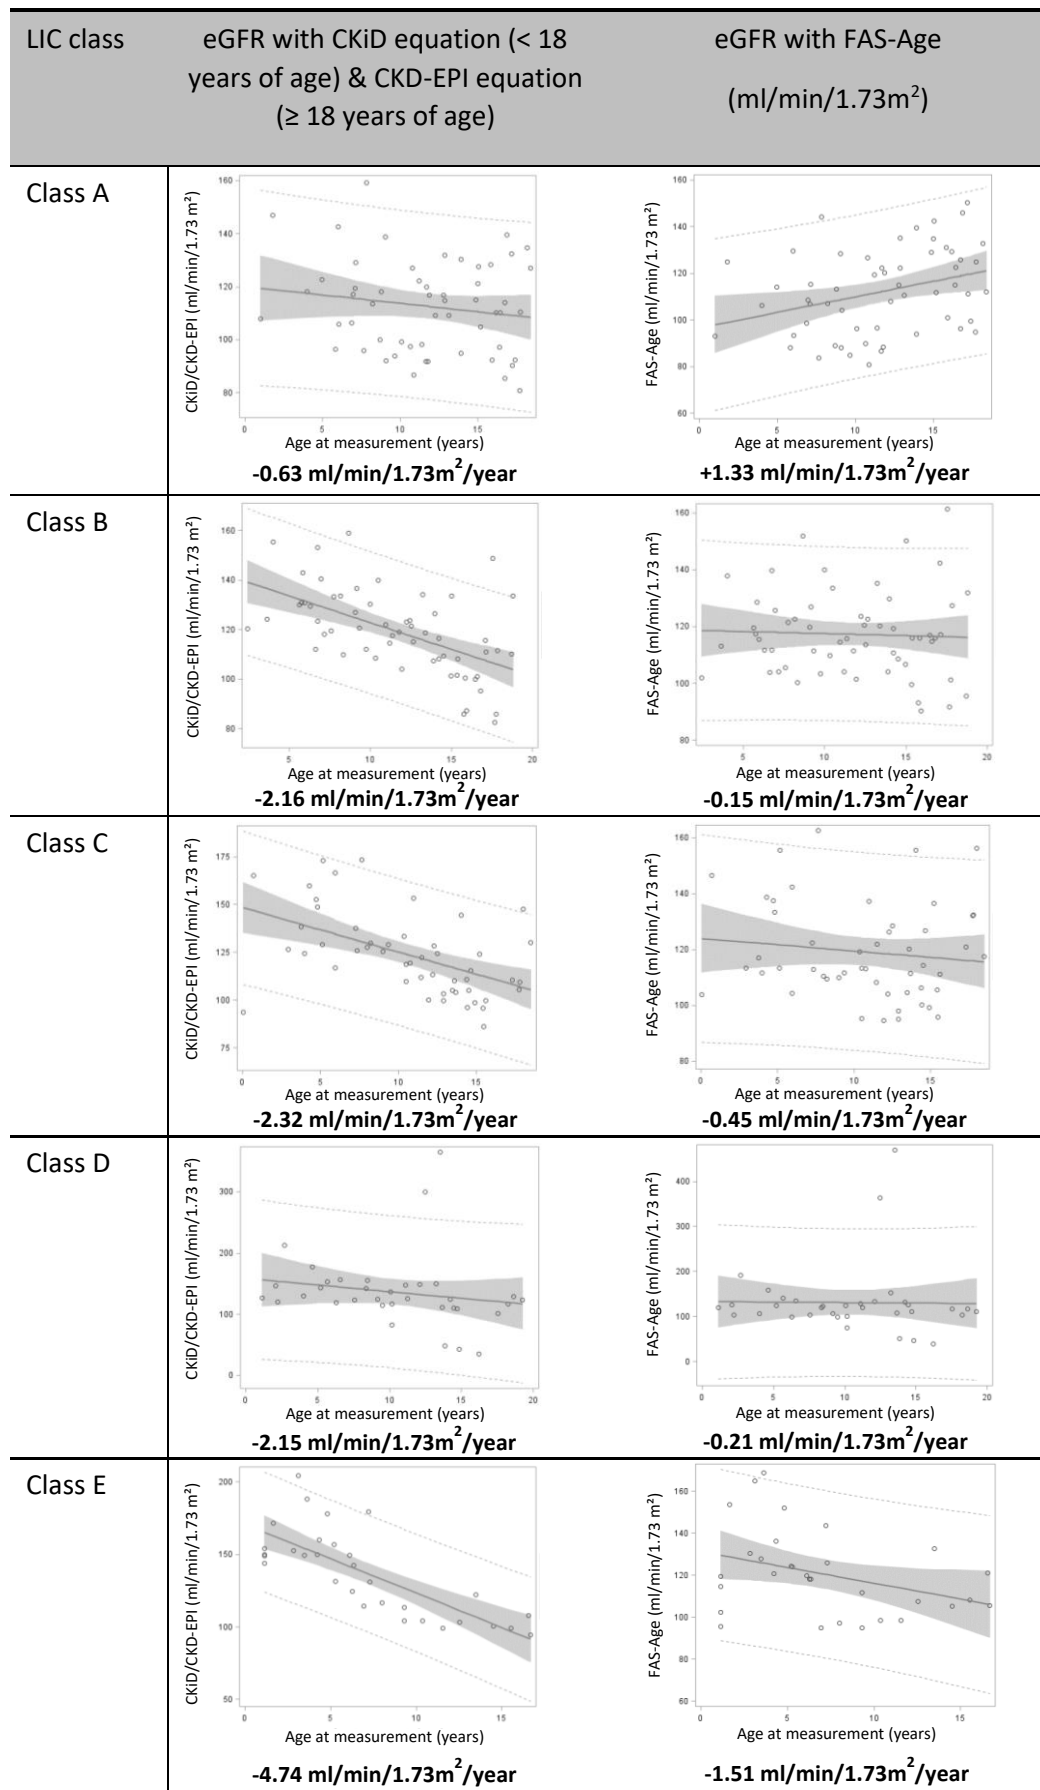

Supplement: cjasn-18-581-s001.pdf [file cjasn-18-581-s001.pdf]
